# Supplementary material
Source: Springer Nature journal article supplement (https://www.springermedizin.de/resource/supplementary/12885_2014_4959_MOESM1_ESM.pdf/9467818)
Supplement: MOESM1 [file 9467818]

**Table S1.** Correlation between CpG island methylator phenotype (CIMP) and clinicopathological parameters of clear cell renal cell carcinomas (ccRCCs) in the learning cohort.

| Clinicopathological parameters        |              | CIMP-negative<br>ccRCCs (n=88) | CIMP-positive<br>ccRCCs (n=14) | <i>P</i> <sup>a</sup>                    |
|---------------------------------------|--------------|--------------------------------|--------------------------------|------------------------------------------|
| Age                                   |              | 62.32±10.21                    | 67.36±11.06                    | <u>9.90×10<sup>-2</sup></u> <sup>b</sup> |
| Sex                                   | Male         | 61                             | 11                             | <u>6.97×10<sup>-1</sup></u> <sup>c</sup> |
|                                       | Female       | 27                             | 3                              |                                          |
| Tumor diameter (cm)                   |              | 4.96±3.02                      | 8.75±2.85                      | <u>1.34×10<sup>-4</sup></u> <sup>b</sup> |
| Histological grades <sup>d</sup>      | G1           | 47                             | 1                              | <u>7.69×10<sup>-6</sup></u> <sup>c</sup> |
|                                       | G2           | 33                             | 4                              |                                          |
|                                       | G3           | 7                              | 7                              |                                          |
|                                       | G4           | 1                              | 2                              |                                          |
| Vascular involvement <sup>e</sup>     | Negative     | 52                             | 1                              | <u>3.02×10<sup>-4</sup></u> <sup>c</sup> |
|                                       | Positive     | 36                             | 13                             |                                          |
| Renal vein tumor thrombi <sup>f</sup> | Negative     | 67                             | 5                              | <u>2.05×10<sup>-3</sup></u> <sup>c</sup> |
|                                       | Positive     | 21                             | 9                              |                                          |
| Growth pattern                        | Expansive    | 82                             | 7                              | <u>6.79×10<sup>-6</sup></u> <sup>c</sup> |
|                                       | Infiltrative | 6                              | 7                              |                                          |
| Tumor necrosis                        | Negative     | 69                             | 2                              | <u>1.26×10<sup>-6</sup></u> <sup>c</sup> |
|                                       | Positive     | 19                             | 12                             |                                          |
| Invasion to renal pelvis              | Negative     | 81                             | 10                             | <u>2.09×10<sup>-2</sup></u> <sup>c</sup> |
|                                       | Positive     | 7                              | 4                              |                                          |
| Pathological TNM stage <sup>g</sup>   | Stage I      | 48                             | 0                              | <u>7.25×10<sup>-5</sup></u> <sup>c</sup> |
|                                       | Stage II     | 1                              | 1                              |                                          |
|                                       | Stage III    | 23                             | 9                              |                                          |
|                                       | Stage IV     | 16                             | 4                              |                                          |

Among the 104 RCCs used in our previous study [7], 102 (88 CIMP-negative and 14 CIMP-positive RCCs), from which sufficient amount of genomic DNA was available, were used in the present study as the learning cohort. <sup>a</sup>*P* values of <0.05 are underlined. <sup>b</sup>Mann-Whitney *U* test. <sup>c</sup>Fisher's exact test. <sup>d</sup>All the tumors were graded on the basis of previously described criteria [19]. <sup>e</sup>The presence or absence of vascular involvement was examined microscopically on slides stained with hematoxylin-eosin and elastica van Gieson. <sup>f</sup>The presence or absence of tumor thrombi in the main trunk of the renal vein was examined macroscopically. <sup>g</sup>All the patients were classified according to the pathological Tumor-Node-Metastasis (TNM) classification [20].
